# Supplementary material for: Odor Discrimination by Lipid Membranes
Source: MDPI journal article supplement (doi:10.3390/membranes13020151), 2023-01-24
Supplement: s1 [file s1]

**Supporting information for**  
**Odor Discrimination by Lipid Membranes**

**Troy W. Lowry, Aubrey E. Kusi-Appiah, Debra Ann Fadool, and Steven Lenhert**

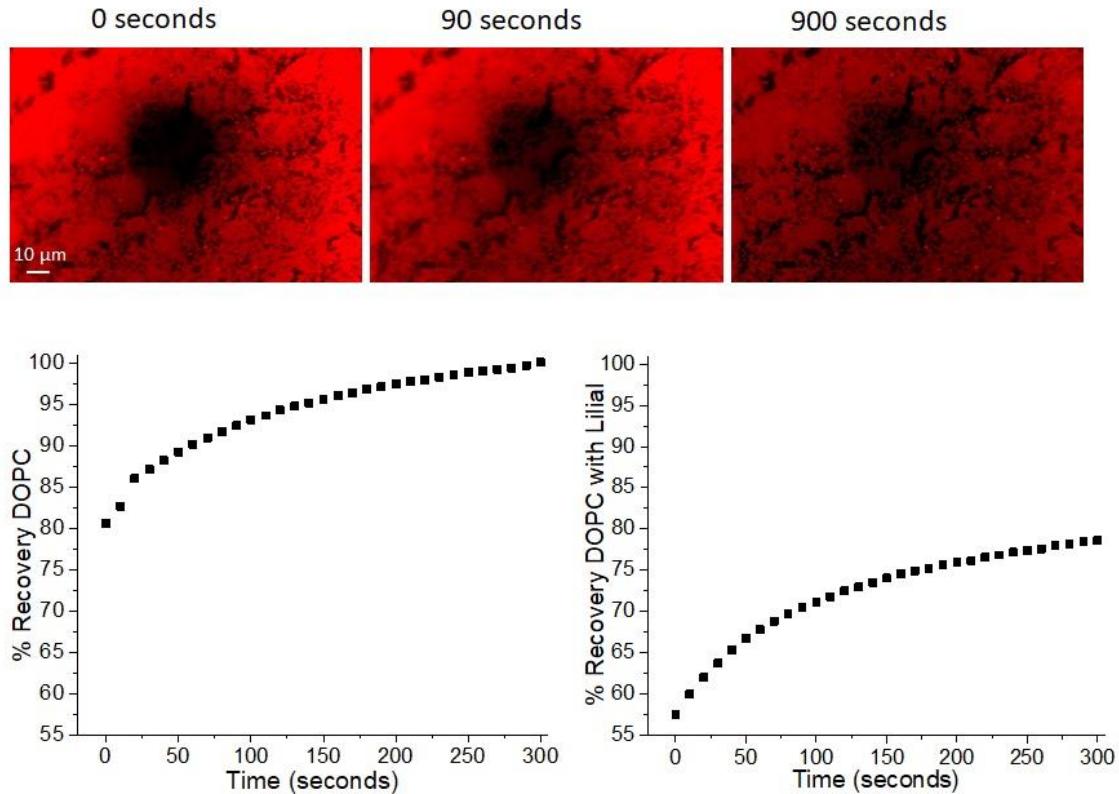

Figure S1. DOPC supported bilayer FRAP response to linal. Fluorescent images show the overexposed area of a DOPC bilayer at application of linal (0 seconds), after 90 seconds and after 900 seconds, indicating the odorant perpetuated lack of complete bilayer recovery. The graph on the left shows a control DOPC bilayer in water graph for fluorescent recovery. This graph reproduces the well-known DOPC recovery in literature. However in the presence of linal, DOPC bilayers have lower fluorescence intensity after bleaching and a lower recovery maximum intensity.

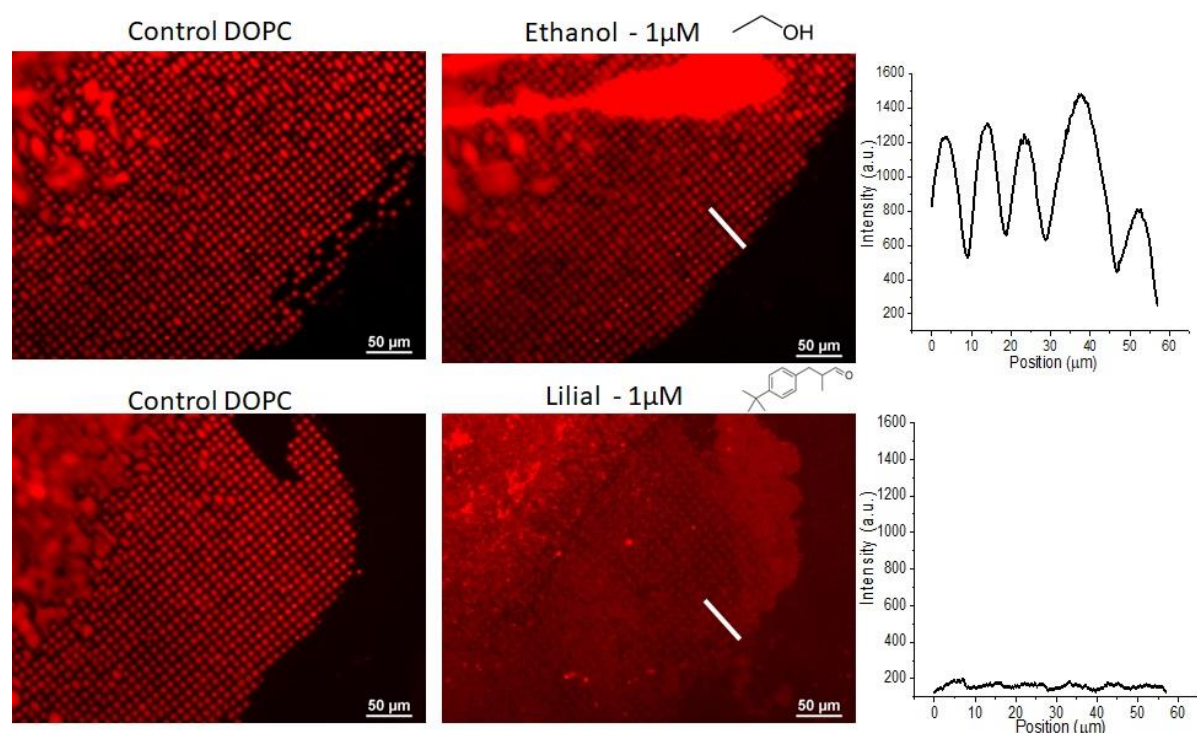

Figure S2. Lilial interaction with Lipid Multilayer Dots. Demonstrated here are fluorescent images of DOPC dot structures both before and after addition of 1  $\mu$ M ethanol and lilial, respectively. While ethanol application suggests multilayer swelling and minimal spreading, lilial produces a strong spreading effect that lowers the intensity of the dot patterns.

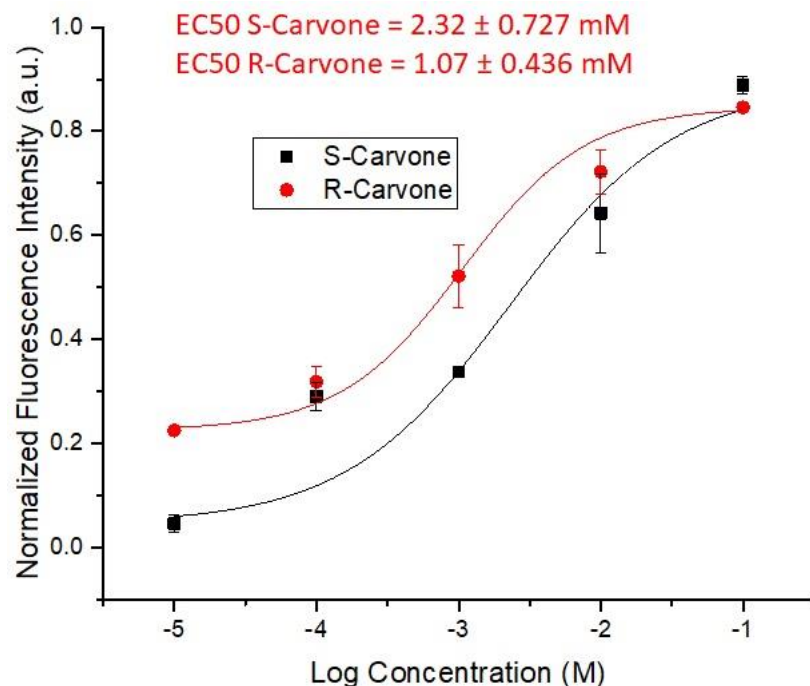

Figure S3. Dose Response of Carvone Enantiomers to Lipid Multilayers. DOPC multilayer dots were exposed to various concentrations of S- and R- enantiomers like in Figure 7. Average intensity of ROIs of 25 dots were drawn around the lipid multilayer patterns both before and after 5 minutes exposure to carvone enantiomer. Each concentration was repeated three times. Dose-response curve fitting distinguishes lipid multilayer response largely due to the stronger multilayer response in S-Carvone concentrations of  $10^{-3}$ M and lower.

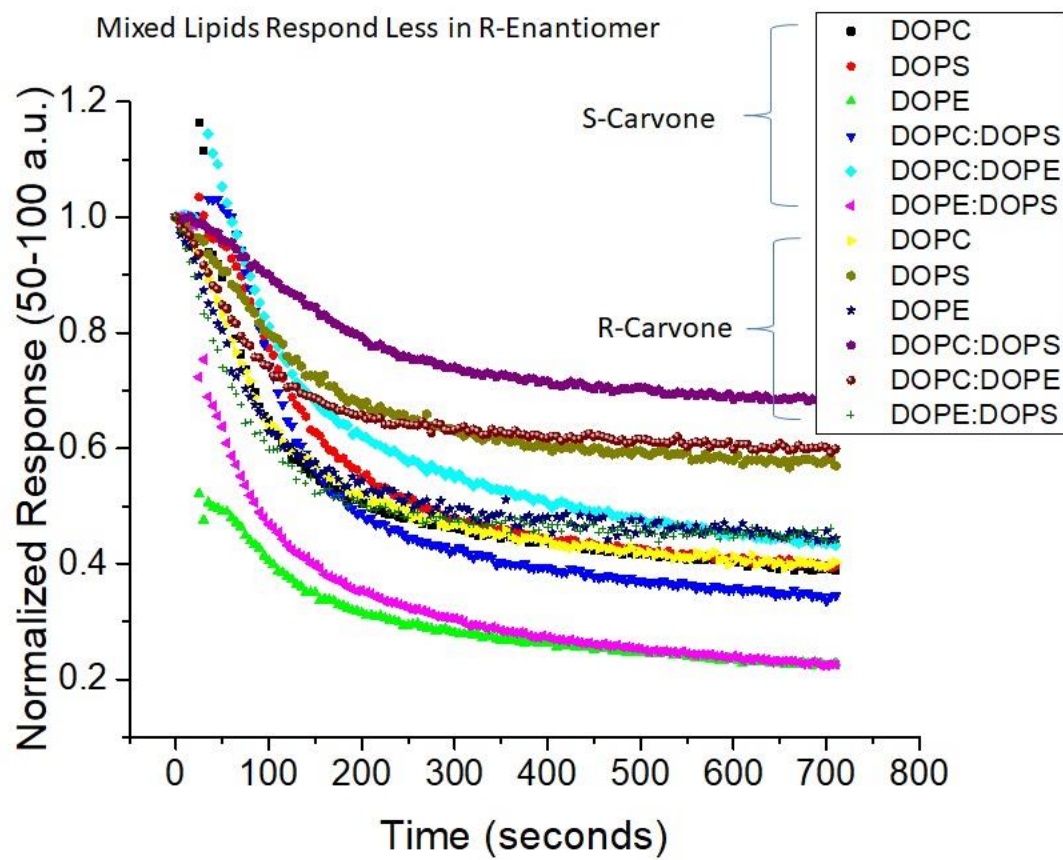

Figure S4. Label-Free Lipid Multilayer Diffraction Gratings of Various Compositions Response to S- and R-Carvone Enantiomers. The graph shows the lipid multilayer grating sensor response from the compositions listed in the legend of to 1mM S-Carvone and R-Carvone. The data shows mixed lipids responded less to the R-enantiomer than the S-enantiomer. The results support the possibility the chirality of lipid bilayers may play a role in selecting how different enantiomers interact in olfactory membranes.
